# Supplementary material
Source: publisher site journal article supplement (http://kjim.org/upload/media/kjim-2023-160-Supplementary-Table-1.pdf)
Supplement: Supplementary file 1 [file kjim-2023-160-Supplementary-Table-1.pdf]

**Supplementary Table 1. Survey for medical staff perception about ASP in EOL care**

| Contents of survey                                                                                                                                                                                                                                                                                                                                                                                                                                                                                                                                                                                                                                                                                                                                                                                                                                                                                                                                                                                               |
|------------------------------------------------------------------------------------------------------------------------------------------------------------------------------------------------------------------------------------------------------------------------------------------------------------------------------------------------------------------------------------------------------------------------------------------------------------------------------------------------------------------------------------------------------------------------------------------------------------------------------------------------------------------------------------------------------------------------------------------------------------------------------------------------------------------------------------------------------------------------------------------------------------------------------------------------------------------------------------------------------------------|
| 1. This survey is used for research purposes. Do you agree with the survey?<br><input type="checkbox"/> Yes <input type="checkbox"/> No                                                                                                                                                                                                                                                                                                                                                                                                                                                                                                                                                                                                                                                                                                                                                                                                                                                                          |
| 2. What is your gender?<br><input type="checkbox"/> Female <input type="checkbox"/> Male                                                                                                                                                                                                                                                                                                                                                                                                                                                                                                                                                                                                                                                                                                                                                                                                                                                                                                                         |
| 3. How old are you? (Write in numbers)<br>Answer: _____                                                                                                                                                                                                                                                                                                                                                                                                                                                                                                                                                                                                                                                                                                                                                                                                                                                                                                                                                          |
| 4. What is your occupation?<br><input type="checkbox"/> 1 <sup>st</sup> -year resident <input type="checkbox"/> 2 <sup>nd</sup> -year resident <input type="checkbox"/> 3 <sup>rd</sup> -year resident<br><input type="checkbox"/> Internal medicine specialist (hospitalist) <input type="checkbox"/> Internal medicine specialist (non-hospitalist)                                                                                                                                                                                                                                                                                                                                                                                                                                                                                                                                                                                                                                                            |
| 5. How much do you know about the antibiotic stewardship program (ASP)?<br>(ASP is an intervention activity that supports optimal use of antibiotics, including medication, duration of treatment, and route of administration)<br><input type="checkbox"/> Fully aware <input type="checkbox"/> Aware <input type="checkbox"/> Neutral <input type="checkbox"/> Do not know <input type="checkbox"/> Unaware at all                                                                                                                                                                                                                                                                                                                                                                                                                                                                                                                                                                                             |
| 6. How much do you know about the advantages of ASP?<br>(ASP can improve patients' treatment outcomes, reduce <i>Clostridioides difficile</i> infections, reduce adverse drug reactions, reduce medical costs, and reduce antibiotic resistance.)<br><input type="checkbox"/> Fully aware <input type="checkbox"/> Aware <input type="checkbox"/> Neutral <input type="checkbox"/> Do not know <input type="checkbox"/> Unaware at all                                                                                                                                                                                                                                                                                                                                                                                                                                                                                                                                                                           |
| 7. Do you think ASP is important in patients with end-of-life (EOL)?<br><input type="checkbox"/> Strongly important <input type="checkbox"/> Important <input type="checkbox"/> Neutral <input type="checkbox"/> Do not matter <input type="checkbox"/> Strongly do not matter<br><input type="checkbox"/> Do not consider it so far                                                                                                                                                                                                                                                                                                                                                                                                                                                                                                                                                                                                                                                                             |
| 8. Do you consider the use or cessation of antibiotics for patients with EOL when writing POLST?<br><input type="checkbox"/> Strongly yes <input type="checkbox"/> Yes <input type="checkbox"/> Neutral <input type="checkbox"/> No <input type="checkbox"/> Strongly no                                                                                                                                                                                                                                                                                                                                                                                                                                                                                                                                                                                                                                                                                                                                         |
| 9. Do you explain to the patient (or caregivers) about the use or cessation of antibiotics when writing POLST?<br><input type="checkbox"/> Yes <input type="checkbox"/> No                                                                                                                                                                                                                                                                                                                                                                                                                                                                                                                                                                                                                                                                                                                                                                                                                                       |
| 10. Do you adjust the antibiotics after POLST?<br><input type="checkbox"/> Yes <input type="checkbox"/> No                                                                                                                                                                                                                                                                                                                                                                                                                                                                                                                                                                                                                                                                                                                                                                                                                                                                                                       |
| 11. Who has the most significant impact on determining antibiotics use after POLST?<br><input type="checkbox"/> Medical staff <input type="checkbox"/> Patient <input type="checkbox"/> Caregiver                                                                                                                                                                                                                                                                                                                                                                                                                                                                                                                                                                                                                                                                                                                                                                                                                |
| 12. Do you think blood culture tests are needed after POLST?<br><input type="checkbox"/> Strongly agree <input type="checkbox"/> Agree <input type="checkbox"/> Neutral <input type="checkbox"/> Disagree <input type="checkbox"/> Strongly disagree                                                                                                                                                                                                                                                                                                                                                                                                                                                                                                                                                                                                                                                                                                                                                             |
| 13. What should you do if an infectious condition could not be ruled out after POLST?<br><input type="checkbox"/> No blood culture tests, no antibiotics <input type="checkbox"/> No blood culture tests, immediate antibiotics use or change<br><input type="checkbox"/> Blood culture tests start, immediate antibiotics use or change <input type="checkbox"/> Blood culture tests start, check the result first                                                                                                                                                                                                                                                                                                                                                                                                                                                                                                                                                                                              |
| 14. Why do you maintain using antibiotics or replace them with broad-spectrum antibiotics after POLST?<br><input type="checkbox"/> I am not 100% sure about the prognosis of the dying phase<br><input type="checkbox"/> I want to give the impression of "healing as much as possible" instead of the impression of "giving up"<br><input type="checkbox"/> I think antibiotics can postpone the course of death<br><input type="checkbox"/> I think antibiotics can relieve the pain due to infection<br><input type="checkbox"/> Antibiotic treatment burden is not excessive (e.g., route of administration, frequency, side effects, cost)<br><input type="checkbox"/> It seems that the hospital where I work encourages the use of antibiotics in EOL patients<br><input type="checkbox"/> There is a request from the patient to continue antibiotic treatment in the EOL situation<br><input type="checkbox"/> There is a request from caregivers to continue antibiotic treatment in the EOL situation |

**Supplementary Table 1. Continued**

Contents of survey

- There is a request from medical staff to continue antibiotic treatment in the EOL situation
- Others (You can fill out the blank below)

15. Why would you stop or de-escalate antibiotics after POLST?

- It is judged antibiotics no longer treat infections in the POLST status
- I think it can reduce the occurrence of antimicrobial resistance (e.g., multi-resistance bacteria)
- I am worried about *Clostridioides difficile* infection
- I am concerned about systemic or local antibiotic side effects (e.g., azotemia, urticaria)
- Antibiotic treatment burden is excessive  
(e.g., frequency and route of administration, measurement of drug concentration)
- I want to reduce the cost of using antibiotics for patients.
- There is a request from the patient to stop antibiotic treatment in the EOL situation
- There is a request from caregivers to stop antibiotic treatment in the EOL situation
- There is a request from medical staff to stop antibiotic treatment in the EOL situation
- Others (You can fill out the blank below)

ASP, antimicrobial stewardship programs; EOL, end-of-life; POLST, physician orders for life-sustaining treatment.
